# Supplementary material
Source: Elsevier journal article supplement (https://www.sciencedirect.com/science/article/pii/S0034935619300830)
Supplement: mmc1 [file S0034935619300830:mmc1.docx]

**ANEXO 1**

**PROTOCOLO ANESTÉSICO Y DE ACTUACIÓN ANTE DESATURACIONES DE LA SRO2:**

Evaluación preoperatoria estándar de nuestro centro el día previo a la intervención.

Inducción anestésica y monitorización: premedicación intraoperatoria con midazolam 1-2 mg/iv. Monitorización del ECG y segmento ST en derivaciones II y V, pulsioximetría, medición de la presión arterial invasiva, profundidad anestésica con BIS modelo XP (Aspect Medical Systems, Newton, MA, USA) en zona frontal izquierda, monitorización de la saturación regional de oxígeno cerebral con NIRS ( INVOS 5100C, Somanetics Corp., Troy, MI, USA) con un sensor en la zona fronto - temporal derecha de los pacientes ( ninguno de ellos presentaba patología carotidea > 50%). Se determinó un valor basal de saturación de oxígeno cerebral regional con el paciente en decúbito supino, sin administración de oxígeno suplementario y sin sedación.

Inducción con etomidato asociado a fentanilo y cisatracurio o rocuronio en ambos grupos para favorecer la intubación endotraqueal. A continuación canalización de la vena yugular interna para acceso central. Mantenimiento anestésico: con sevofluorano mínimo CAM de 1, perfusión continúa de remifentanilo y bolus de cisatracurio o rocuronio para mantener BIS entre 40-60. Durante la CEC: Administración de heparina sódica 3 mgr/Kg para mantener un ACT de 400 s.

Si la SrO2 durante la cirugía disminuía por debajo del 20% del valor de la línea base o por debajo del 50% del valor absoluto, se actuó según el protocolo que se detalla en la Fig 1 modificado de Denault et al. (9). Estas intervenciones incluyeron medidas para eliminar la obstrucción mecánica del flujo cerebral (reposicionamiento de la cabeza o cánulas de derivación), aumentar el suministro cerebral de oxígeno (aumento de la FiO2, pCO2, presión arterial media, gasto cardíaco o flujo de la bomba), disminuir el consumo (aumento de la profundidad anestésica).

Se determinó la desaturación prolongada como el área de SrO2 bajo la curva (AUC) de más de 150 min% bajo el 20% del valor de referencia, o el AUC de más del 50% inferior al 50% de valor absoluto.

En el postoperatorio en UCI se mantuvo la sedoanalgesia con propofol y morfina/oxicodona hasta el calentamiento del paciente. Se procedió a la extubación del paciente según criterios UCI.
